# Supplementary material
Source: PubMed Central journal article supplement (PMC10041819)
Supplement: NIHMS1881109-supplement-1.pdf [file NIHMS1881109-supplement-1.pdf]

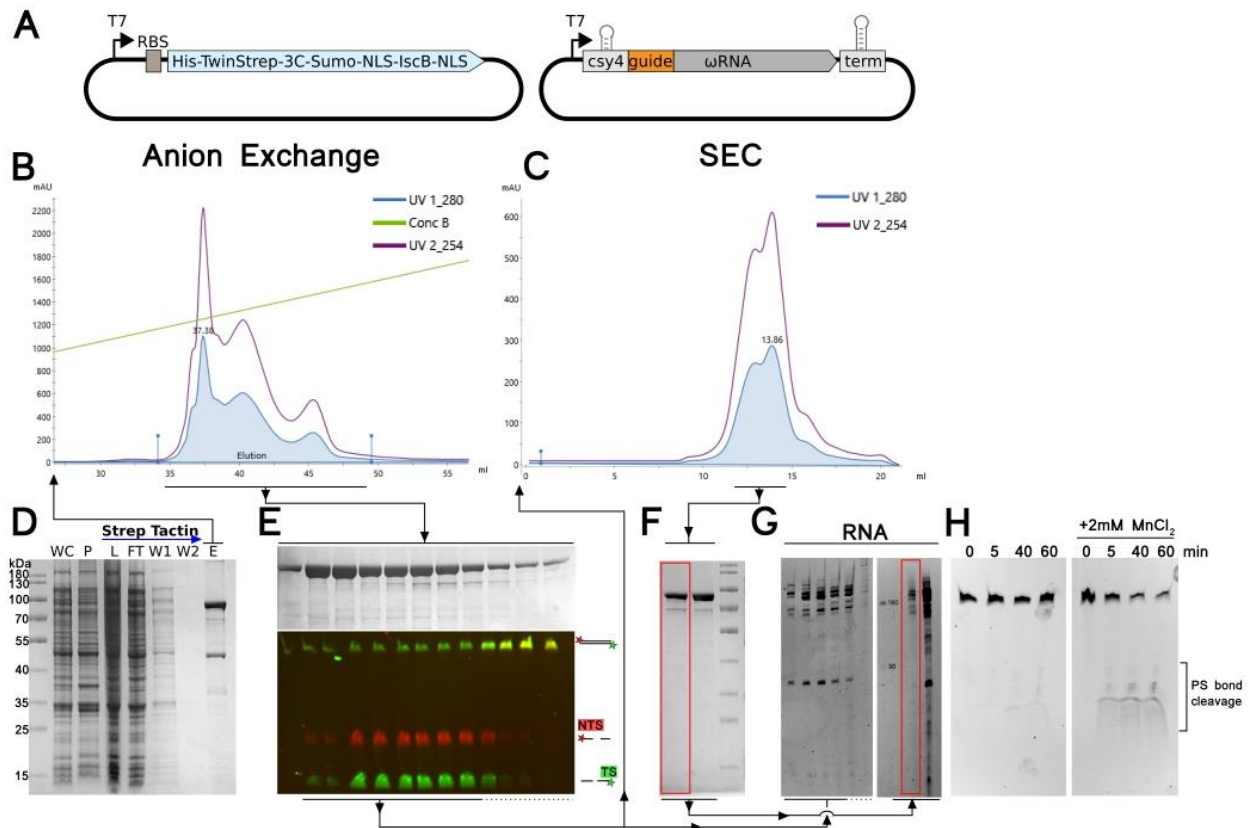

**Fig. S1. Reconstitution of the IscB- $\omega$ RNA RNP.**

(A) IscB and  $\omega$ RNA co-expression scheme. (B) Elution profile of the IscB- $\omega$ RNA RNP on anion exchange chromatography. (C) Elution profile of IscB- $\omega$ RNA RNP on size-exclusion chromatography (SEC). (D) SDS-PAGE analysis of the Strep-tactin purified IscB- $\omega$ RNA RNP. Whole cell (WC), lysed pellet (P), lysate supernatant (L), strep resin flow thru (FT), Dnase I wash (W1), wash2 (W2), elution (E). (E) Top: SDS-PAGE of anion exchange peak fractions. Bottom: denaturing-PAGE showing cleavage activity of each fraction. Red channel shows non target strand (NTS). Green channel shows target stand (TS). (F) SDS-PAGE of SEC peak fractions. (G) Denaturing-PAGE showing the  $\omega$ RNA quality extracted from IscB RNP. Arrows depict the procedural flow of the purification process. Red boxes depict the final purified sample in SDS-PAGE gel (protein) and Denaturing-PAGE (RNA). (H) Denaturing urea-PAGE gel showing time-resolved cleavage reaction of cryo-EM sample NTS-DNA containing phosphorothioate bonds. Minimal cleavage of phosphorothioate bonds observed in standard cleavage conditions. The addition of 2mM MnCl<sub>2</sub> is shown to rescue cleavage of NTS-DNA by RuvC.

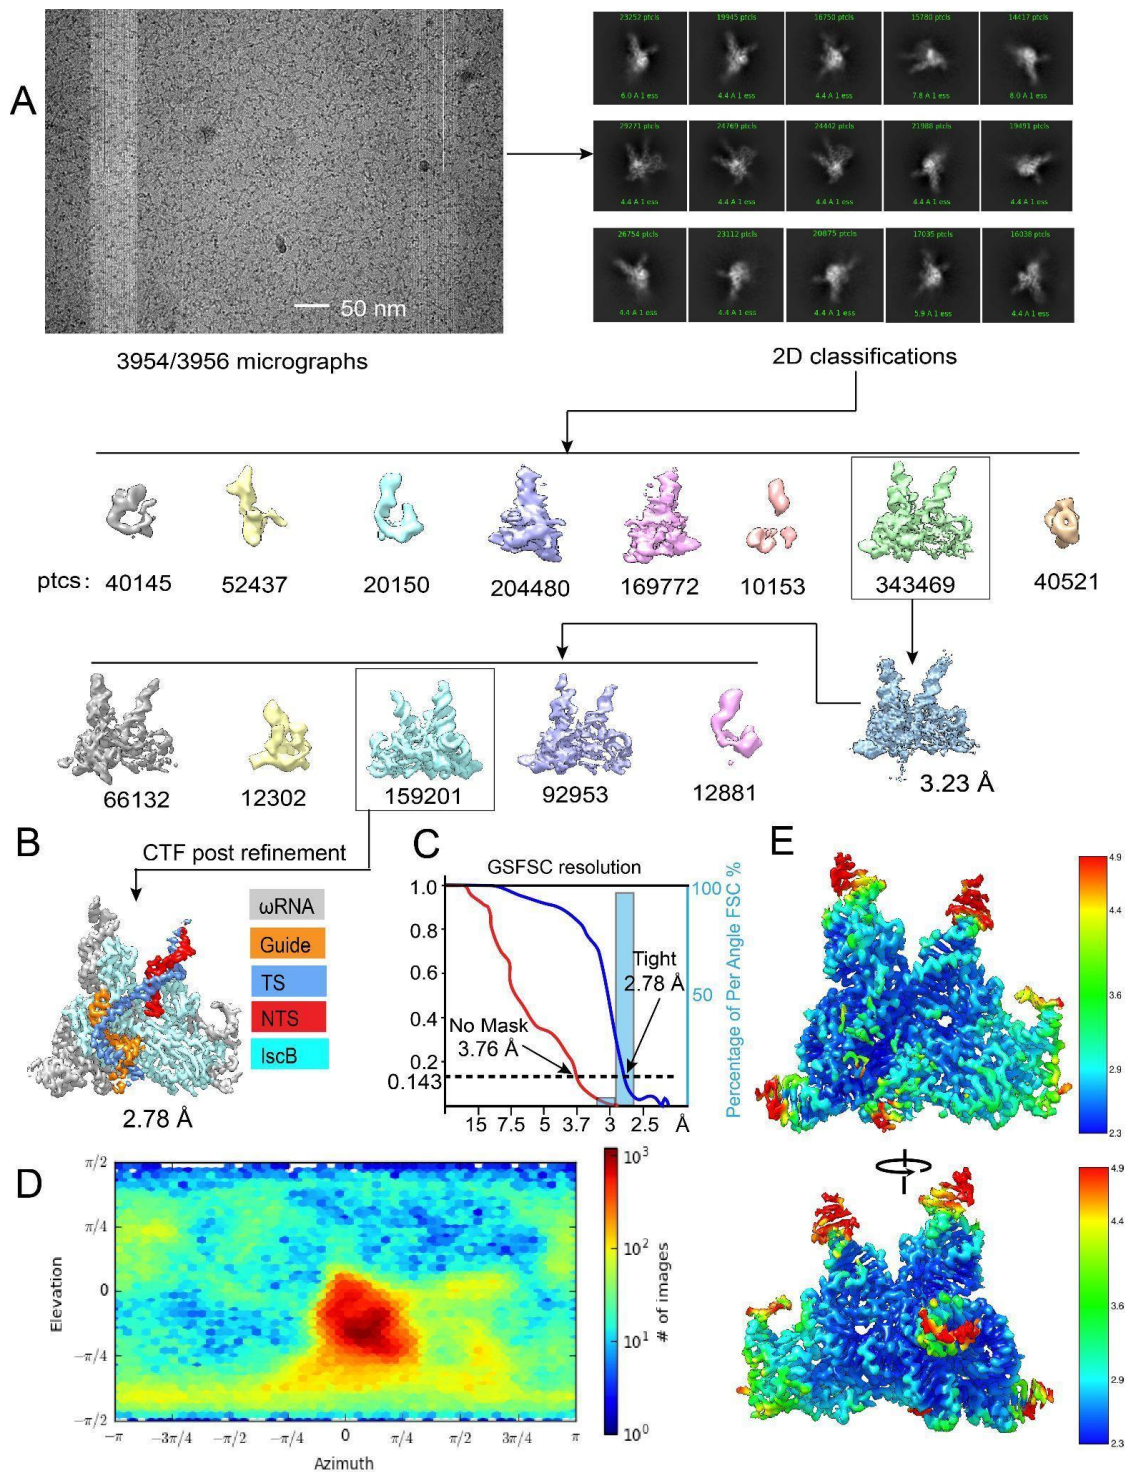

**Fig. S2. CryoEM single particle reconstruction of IscB- $\omega$ RNA-DNA complex.** (A, B) Workflow of the cryo-EM image processing and 3D reconstruction for the IscB- $\omega$ RNA/DNA complex. Final electron density map with the density from each chain colored separately. (C) Fourier Shell Correlations (FSC) of IscB- $\omega$ RNA/DNA complex reconstruction, with the gold-standard cutoff (FSC = 0.143) marked with a dotted line. (D) Direction distribution plot. (E) Final electron density map showing local resolution.

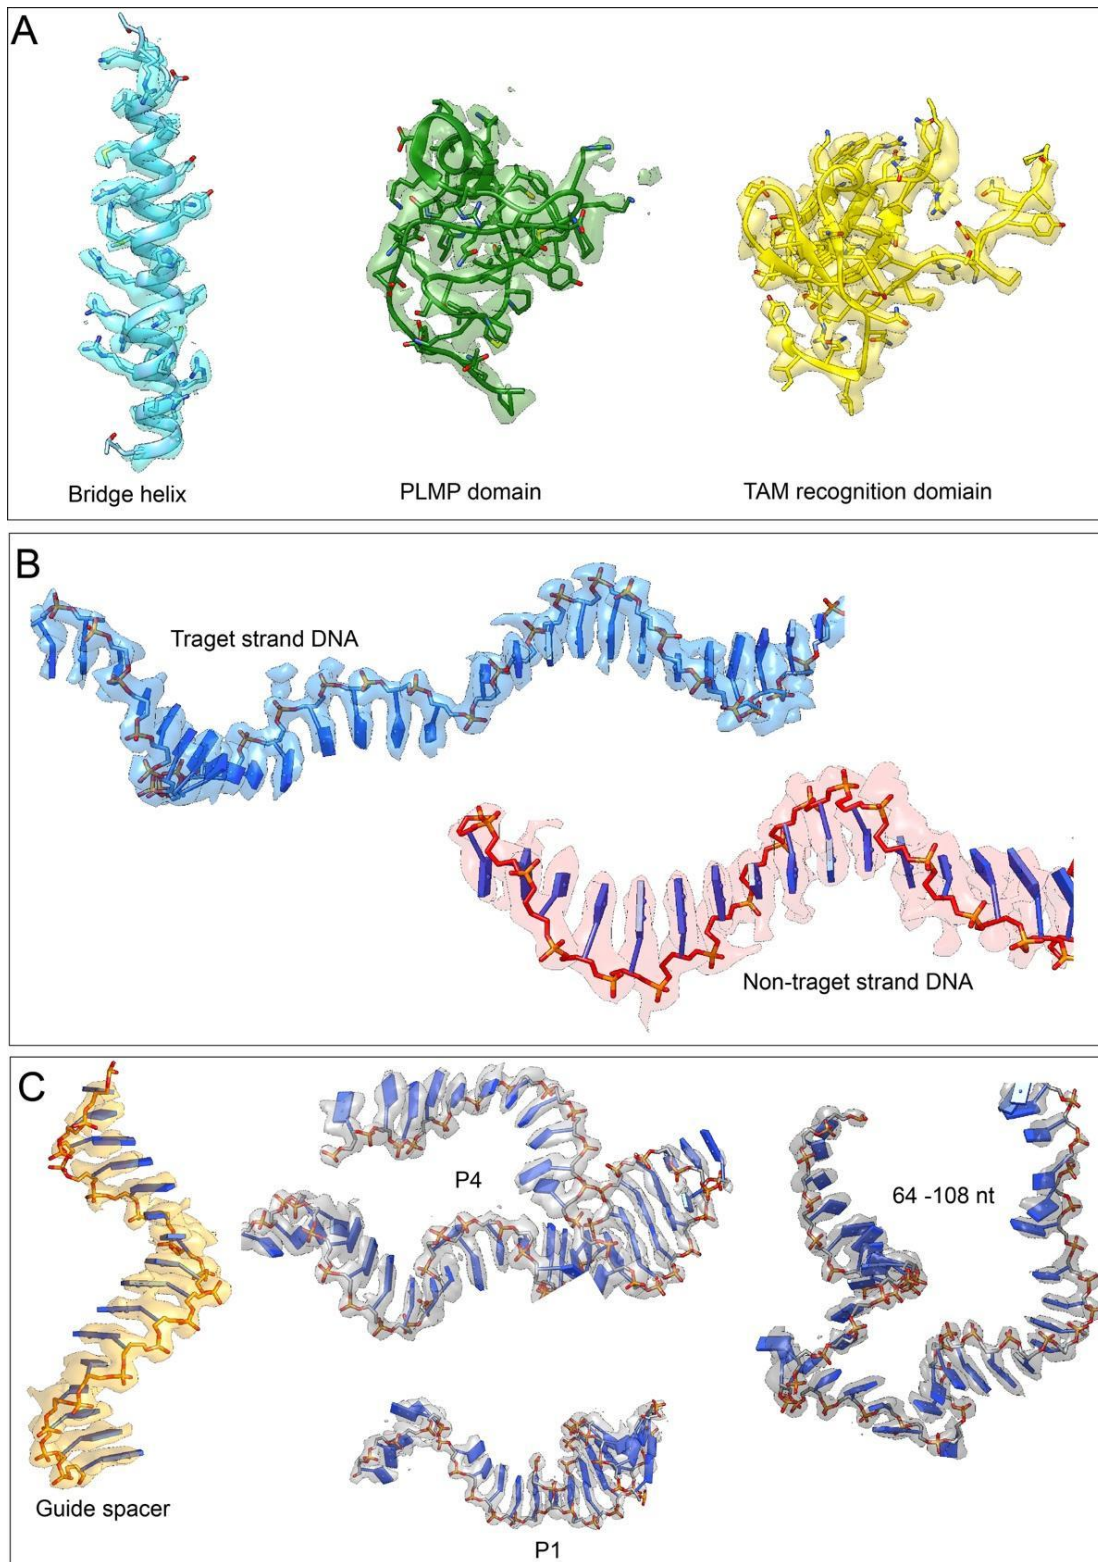

**Fig. S3. Representative local map density for the different functional states.** (A) EM densities for representative protein regions inside IscB- $\omega$ RNA/DNA complex. (B) EM densities for the target and non-target DNA strands inside the IscB- $\omega$ RNA/DNA complex. (C) EM densities for representative RNA regions inside IscB- $\omega$ RNA/DNA.

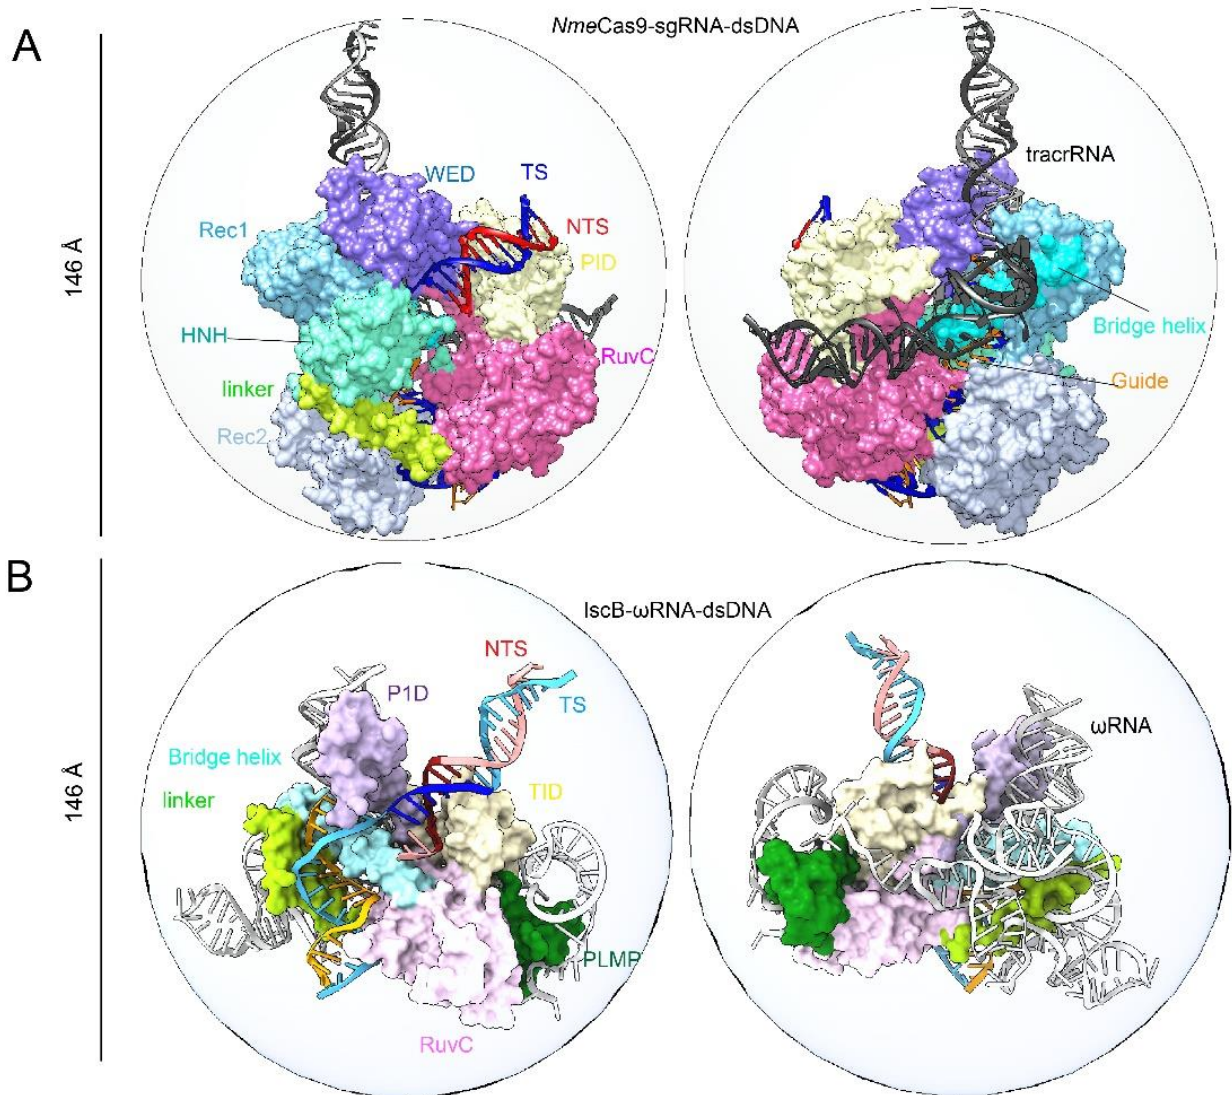

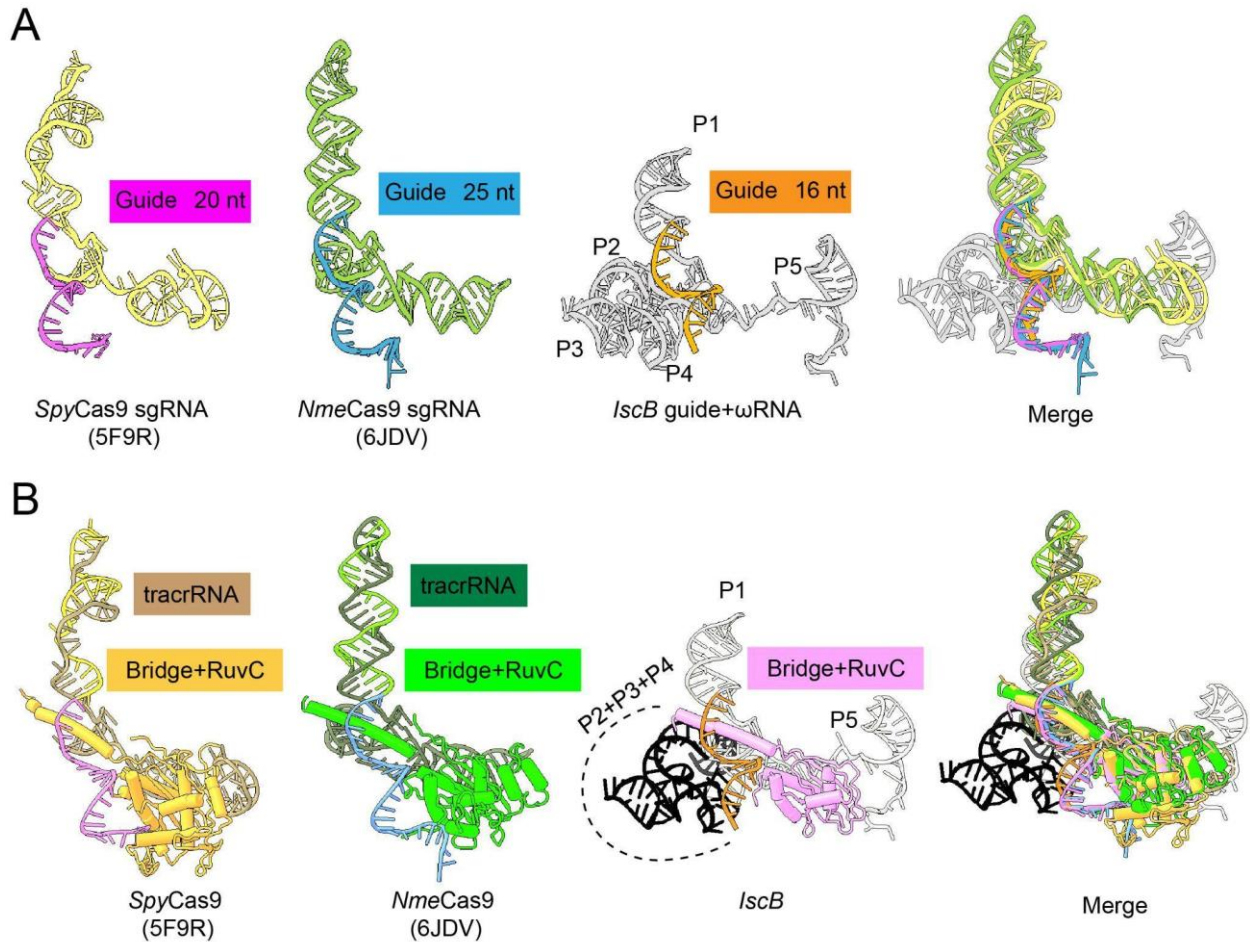

**Fig. S5. Comparative structural analysis of  $\omega$ RNA and core IscB domains with tracrRNA, guide RNA, and core Cas9 domains**

**(A)** Structural comparison between the RNA components of the SpyCas9, NmeCas9, and IscB RNP. All three elements aligned showing structural conservation of  $\omega$ RNA elements in Cas9 crRNA and tracrRNA. **(B)** Structural comparison between core protein domains and RNA components of SpyCas9, NmeCas9, and IscB. The bridge helix and RuvC domain are conserved across SpyCas9, NmeCas9, and IscB. All three elements aligned showing structural conservation of the bridge helix, RuvC domains, and  $\omega$ RNA elements in Cas9 crRNA and tracrRNA.

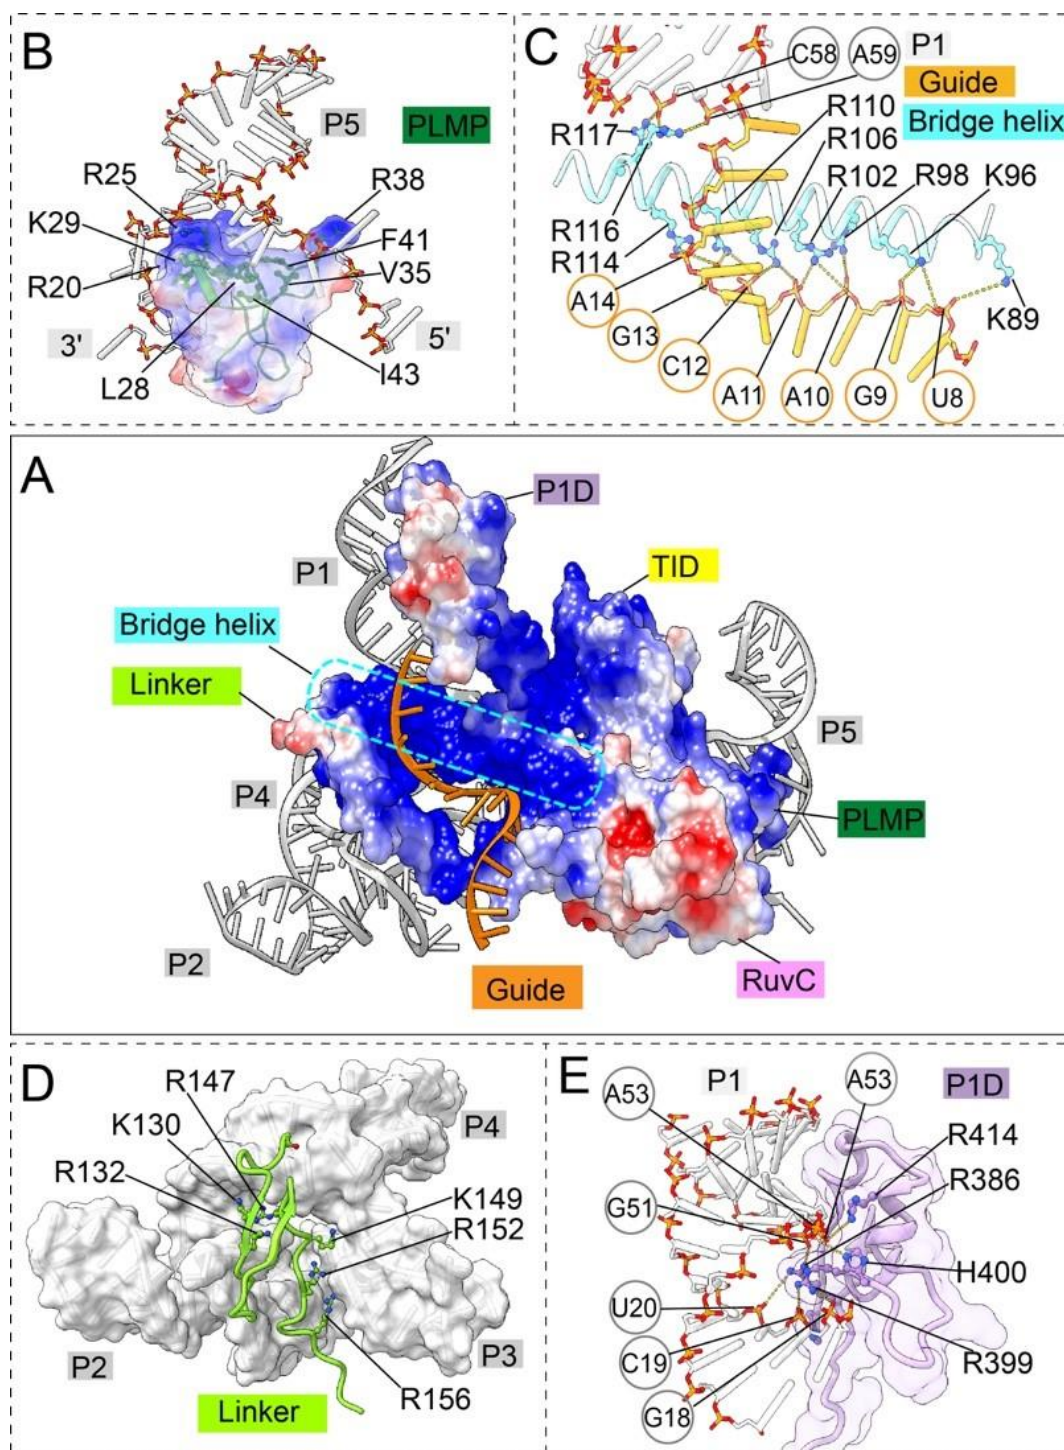

**Fig. S6. IscB protein domain interactions with  $\omega$ RNA and guide RNA.**

**(A)** Electrostatic surface representation of IscB superimposed with the cartoon representation of  $\omega$ RNA. IscB displays extensive positive charges (in blue) on surface for nucleic acid interaction. The bridge helix is boxed in light blue. **(B)** Close-up view of the IscB PLMP domain interactions with the base of P5 in  $\omega$ RNA. **(C)** Close-up view of the bridge helix domain making consecutive phosphate backbone contacts to the guide RNA. **(D)** Close-up view of the IscB  $\beta$ -hairpin+linker domain to the P3 and J2 helices in the  $\omega$ RNA lobe. **(E)** Close-up view of P1 interaction domain (P1D) contacting P1 of  $\omega$ RNA.

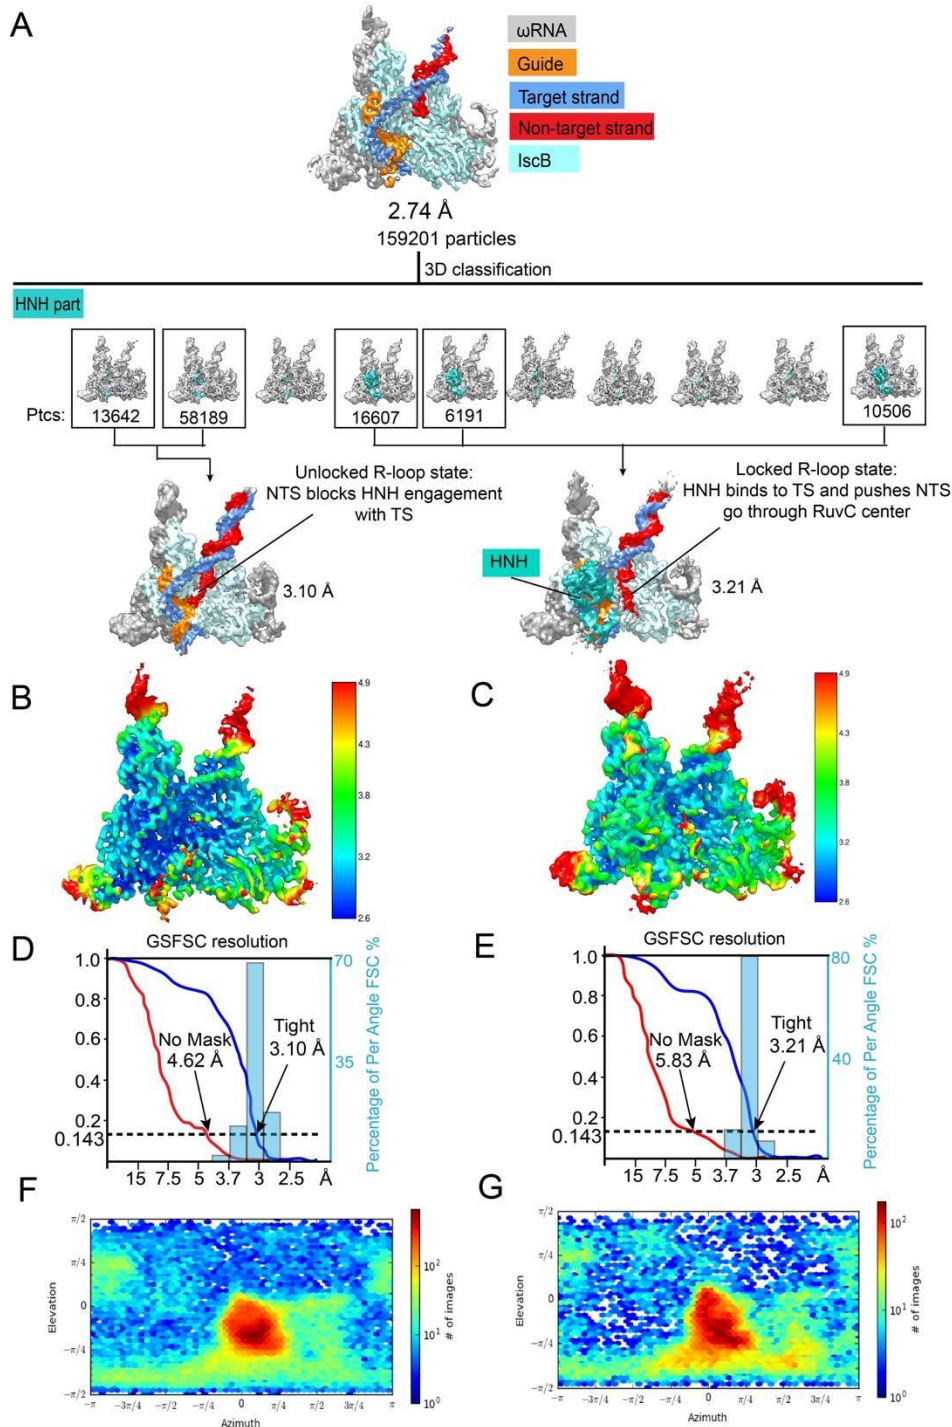

**Fig. S7. Post-refinement to resolve HNH-docked conformational state. (A)** Workflow to post-refine the high-resolution IscB- $\omega$ RNA/DNA data set. Finer 3D classification to partition HNH-docked conformational state (locked R-loop, 3.1 Å resolution) from the undocked state (unlocked R-loop, 3.2 Å resolution). Out of the 160,000 particles, ~40,000 exist in the HNH-docked state. **(B, C)** Local resolution distribution and **(D, E)** Fourier Shell Correlations of the unlocked and locked R-loop state, respectively. The gold-standard cutoff (FSC = 0.143) is marked with a dotted line. **(F, G)** Direction distribution plot of the unlocked and locked R-loop state, respectively.

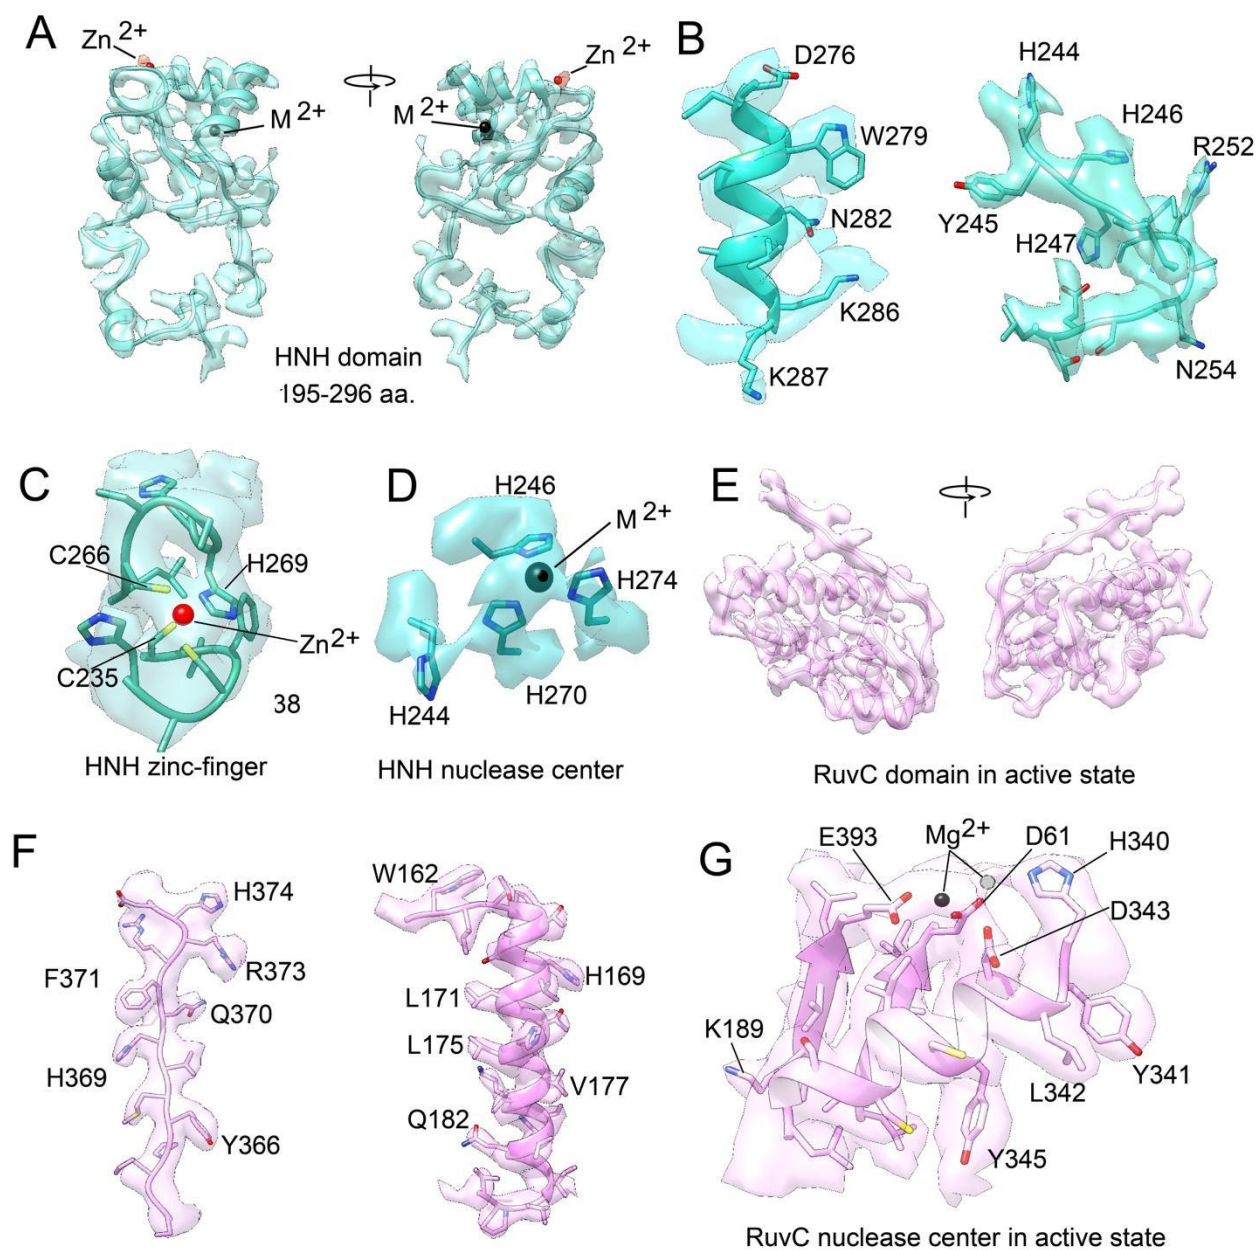

**Fig. S8. Local density for HNH and RuvC domains in locked R-loop (active) state.** (A) EM density for HNH domain in locked R-loop state. (B) EM local densities for representative regions in the HNH domain. (C) EM local density of zinc finger in HNH domain. (D) EM local density of HNH active site showing metal ion in black. (E) EM density for RuvC domain in locked R-loop state. (F) EM local densities for representative regions in the RuvC domain. (G) Local EM density of the RuvC active site showing metal ions. Metal ion in black seen in EM density. Metal ion in gray is expected but not seen in density due to phosphorothioate substitution in NTS-DNA.



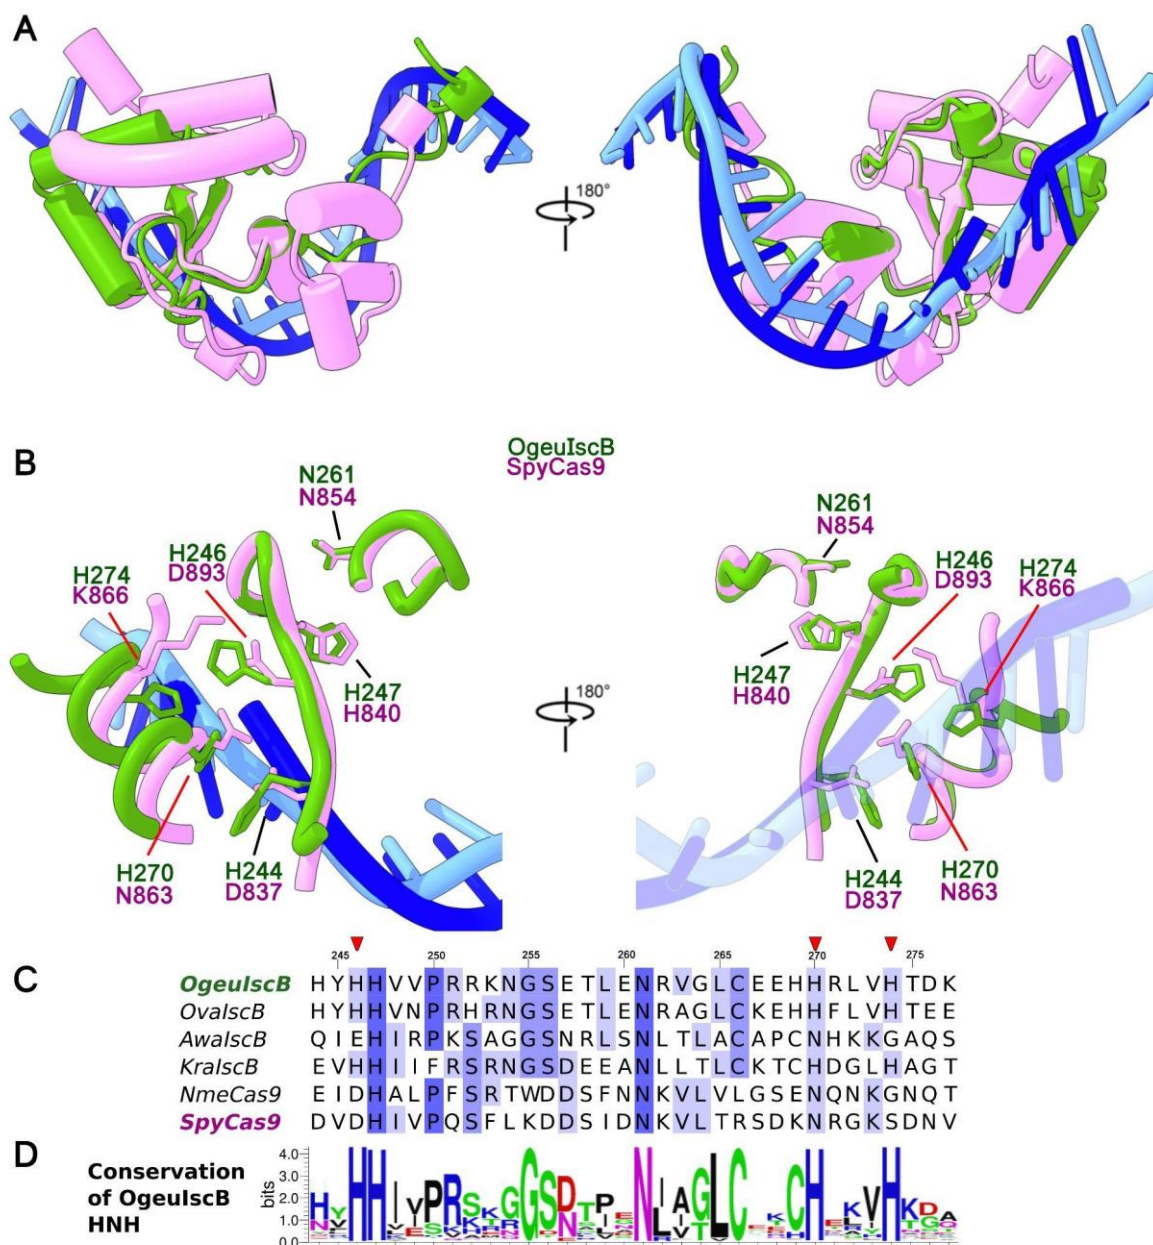

**Fig. S9. Comparison of IscB and Cas9 HNH active site.** (A) Structural alignment of HNH domain and TS-DNA of SpyCas9 (PDB: 7S4X) and IscB. OgeulscB, green; OgeulscB TS-DNA, light blue; SpyCas9, pink; SpyCas9 TS-DNA, blue. (B) Close-up structural alignment of the HNH active site of SpyCas9 and IscB RNP. (C) Amino acid sequence alignment of HNH active site. Red triangles mark the Histidine residues coordinating a metal ion in the OgeulscB structure. Sequence is numbered according to OgeulscB amino acid sequence. (D) Weblogo of HNH active site of OgeulscB aligned with top 99 blastp hits in NCBI NR database.

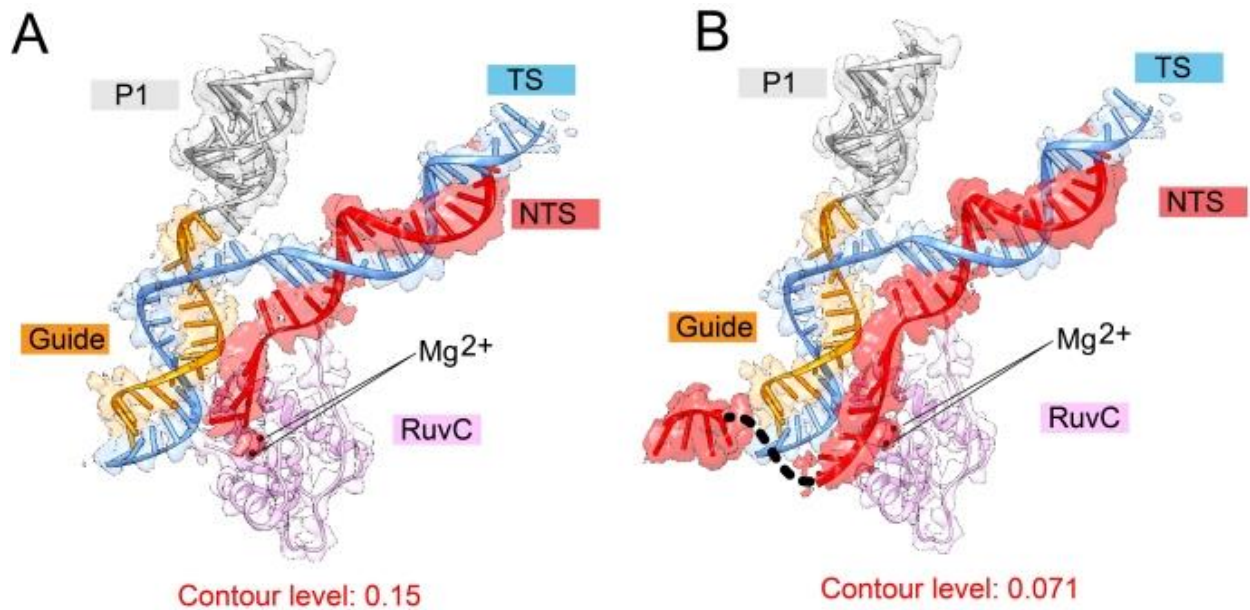

**Fig. S10. NTS-DNA in RuvC nuclease center.** (A) EM local density of NTS-DNA in locked R-loop (active) structure. NTS-DNA is not seen exiting the nuclease center at high contour level (0.15). (B) EM local density of NTS-DNA in locked R-loop (active) structure at higher contour level (0.071) showing that phosphorothioate bonds in NTS-DNA strand are intact in cryo-EM sample. NTS-DNA is seen exiting nuclease center. NTS-DNA strand in TAM distal R-loop is not observed due to high flexibility.

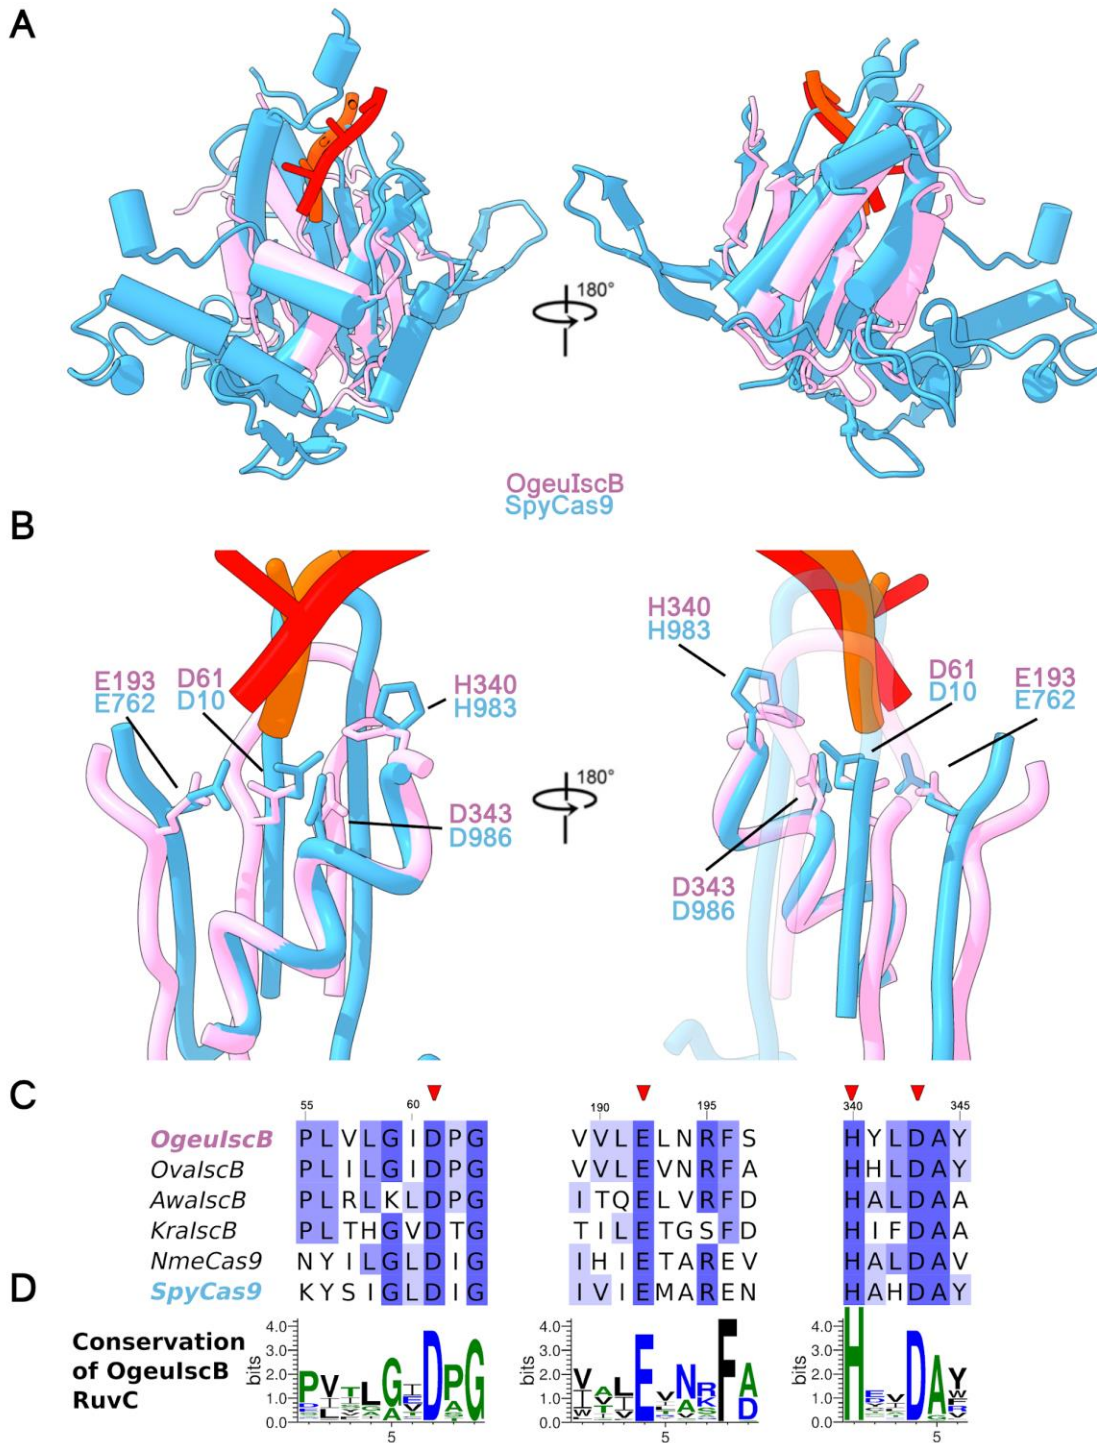

**Fig. S11. Comparison of IscB and Cas9 RuvC active site.** (A) Structural alignment of the RuvC domain and NTS-DNA of SpyCas9 (PDB: 7S4X) and IscB. OgeulscB, pink; OgeulscB NTS-DNA, orange; SpyCas9, light blue; SpyCas9 NTS-DNA, red. (B) Close-up of RuvC active site of SpyCas9 (PDB: 7S4X) and IscB RNP. (C) Amino acid sequence alignment of RuvC active site. Red triangles mark the active site residues. Sequence is numbered according to OgeulscB amino acid sequence. (D) Weblogo of RuvC active site of OgeulscB aligned with top 99 blastp hits in NCBI NR database.

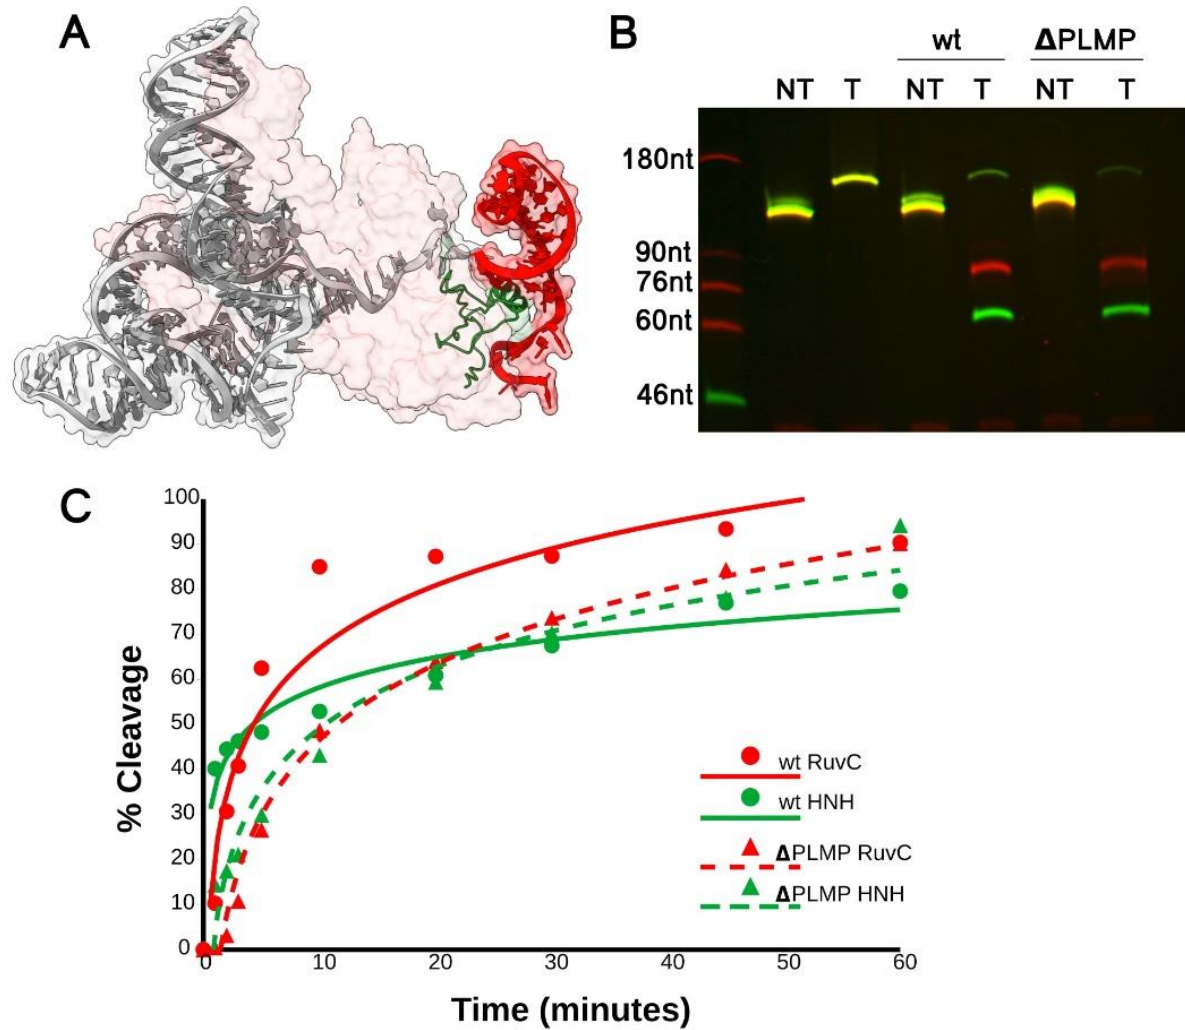

**Table S1. Cryo-EM data collection, refinement, and validation statistics**

| Name                                                                        | IscB-<br>ωRNA/Target  | Unlocked R-<br>loop state | Locked R-<br>loop state |
|-----------------------------------------------------------------------------|-----------------------|---------------------------|-------------------------|
| PDB ID                                                                      |                       | (8CSZ)                    | (8CTL)                  |
| EMDB ID                                                                     | (7UTN)<br>(EMD-26782) | (EMD-26994)               | (EMD-<br>26976)         |
| <b>Data collection and Processing (for each dataset)</b>                    |                       |                           |                         |
| Microscope                                                                  | Krios G3i             | Krios G3i                 | Krios G3i               |
| Voltage (keV)                                                               | 300                   | 300                       | 300                     |
| Camera                                                                      | K3                    | K3                        | K3                      |
| Magnification                                                               | 81,000                | 81,000                    | 81,000                  |
| Pixel size at detector (Å/pixel)                                            | 1.07Å                 | 1.07Å                     | 1.07Å                   |
| Total electron exposure (e <sup>-</sup> /Å <sup>2</sup> )                   | 50                    | 50                        | 50                      |
| Exposure rate (e-/pixel/sec)                                                | 15                    | 15                        | 15                      |
| Number of frames collected during exposure                                  | 50                    | 50                        | 50                      |
| Defocus range (μm)                                                          | 0.8 – 2.5             | 0.8 – 2.5                 | 0.8 – 2.5               |
| Phase plate (if used)                                                       | No                    | No                        | No                      |
| - phase shift range (in degrees)                                            |                       |                           |                         |
| - number of images per phase plate position                                 |                       |                           |                         |
| Automation software (EPU, SerialEM or manual)                               | EPU<br>No             | EPU<br>No                 | EPU<br>No               |
| Tilt angle (if grid was tilted)                                             | No                    | No                        | No                      |
| Energy filter slit width (if used)                                          | 3956                  | 3956                      | 3956                    |
| Micrographs collected (no.)                                                 | 3956                  | 3956                      | 3956                    |
| Micrographs used (no.)                                                      | 4,076,994             | 4,076,994                 | 4,076,994               |
| Total extracted particles (no.)                                             |                       |                           |                         |
| <b>For each reconstruction:</b>                                             | 4,076,994             | 4,076,994                 | 4,076,994               |
| Refined particles (no.)                                                     | 159,201               | 71,831                    | 33,304                  |
| Final particles (no.)                                                       | C1                    | C1                        | C1                      |
| Point-group or helical symmetry parameters                                  | N/A                   | N/A                       | N/A                     |
| Estimated error of translations/rotations (if available)                    |                       |                           |                         |
| Resolution (global, Å)                                                      | 2.7                   | 3.1                       | 3.2                     |
| FSC 0.5 (unmasked/masked)                                                   | 2.0 – 10              | 2.5 – 10                  | 2.5 – 10                |
| FSC 0.143 (unmasked/masked)                                                 | N/A                   | N/A                       | N/A                     |
| Resolution range (local, Å)                                                 | -78                   | -78                       | -78                     |
| Resolution range due to anisotropy (Å)                                      | Global                | Global                    | Global                  |
| Map sharpening <i>B</i> factor (Å <sup>2</sup> ) / ( <i>B</i> factor Range) |                       |                           |                         |
| Map sharpening methods                                                      |                       |                           |                         |
| <b>Model composition (for each model)</b>                                   |                       |                           |                         |
| Protein                                                                     | 397                   | 401                       | 494                     |
| Ligands                                                                     | 0                     | 0                         | 3                       |
| RNA/DNA                                                                     | 228                   | 233                       | 236                     |
| <b>Model Refinement (for each model)</b>                                    |                       |                           |                         |
| Refinement package                                                          | CryoSPARC             | CryoSPARC                 | CryoSPARC               |
| - real or reciprocal space                                                  | Real                  | Real                      | Real                    |
| - resolution cutoff                                                         | 2.78                  | 3.10                      | 3.20                    |
| Model-Map scores                                                            |                       |                           |                         |
| -CC                                                                         | N/A                   | N/A                       | N/A                     |
| - Average FSC                                                               | N/A                   | N/A                       | N/A                     |
| <i>B</i> factors (Å <sup>2</sup> )                                          | 76.1                  | 82.4                      | 86.0                    |
| Protein residues                                                            | 65.9                  | 68.3                      | 72.3                    |
| Ligands                                                                     | N/A                   | N/A                       | N/A                     |
| RNA/DNA                                                                     | 81.9                  | 85.4                      | 96.7                    |

|                                                |       |       |       |
|------------------------------------------------|-------|-------|-------|
| R.m.s. deviations from ideal values            |       |       |       |
| Bond lengths (Å)                               | 0.007 | 0.009 | 0.005 |
| Bond angles (°)                                | 0.674 | 0.798 | 0.644 |
| <b>Validation (for each model)</b>             |       |       |       |
| MolProbity score                               | 1.67  | 3.24  | 1.75  |
| CaBLAM outliers                                | N/A   | N/A   | N/A   |
| Clashscore                                     | 8.15  | 31.1  | 11.2  |
| Poor rotamers (%)                              | 0.00  | 0.00  | 0.00  |
| C-beta deviations                              | 0.00  | 0.06  | 0.00  |
| EMRinger score (if better than 4 Å resolution) | N/A   | N/A   | N/A   |
| Ramachandran plot                              |       |       |       |
| Favored (%)                                    | 98.22 | 92.41 | 95.17 |
| Outliers (%)                                   | 0.00  | 0.00  | 0.00  |

**Movie S1. Rotating views of the IscB- $\omega$ RNA/DNA cryo-EM reconstruction.**

**Movie S2. Rotating views and alignment of IscB- $\omega$ RNA-dsDNA and SpyCas9-sgRNA-dsDNA complex.**

**Movie S3. Rotating views and superposition of  $\omega$ RNA and sgRNA of SpyCas9.** RNA regions are labeled in the movie.

**Movie S4. Structural basis of TAM recognition in IscB.**

**Movie S5. Rotating views and comparison of unlocked and locked R-loop states of IscB- $\omega$ RNA-dsDNA.**

**Movie S6. Structural basis of cleavage mechanism in HNH and RuvC domains.** In the unlocked R-loop state, HNH blocks NTS-DNA for entering the RuvC cleavage site, HNH also cannot contact TS-DNA. As the result, no DNA cleavage takes place. In locked R-loop state, the HNH domain passes underneath NTS-DNA, binds the RNA/TS-DNA heteroduplex, and is catalytically competent to cleave the TS-DNA. The NTS-DNA in turn is allowed to enter the RuvC center for cleavage. The two events take place in an ordered fashion, which explains why TS-DNA cleavage is faster than the NTS-DNA cleavage. In essence, HNH allosterically controls the cleavage activity of RuvC in IscB. A similar mechanism is expected to take place in Cas9.
